# Supplementary material for: Development of a fluoride-anion sensor based on aggregation of a dye-modified polyhedral oligomeric silsesquioxane
Source: Royal Society of Chemistry journal article supplement (doi:10.1039/d2cc04801a), 2022-01-01
Supplement: d2cc04801a1.pdf [file d2cc04801a1.pdf]

**Supporting Information**

**Development of a Fluoride-Ion Sensor based on Aggregation of a Dye-modified Polyhedral Oligomeric Silsesquioxane**

Daisuke Iizuka, Masayuki Gon, Kazuo Tanaka\* and Yoshiki Chujo

*Department of Polymer Chemistry, Graduate School of Engineering, Kyoto University Katsura, Nishikyo-ku, Kyoto 615-8510, Japan*

E-mail: [tanaka@poly.synchem.kyoto-u.ac.jp](mailto:tanaka@poly.synchem.kyoto-u.ac.jp)

| <b>Contents</b>                              | page |
|----------------------------------------------|------|
| Materials and Methods                        | S-3  |
| Synthetic procedures and characterization    |      |
| Synthesis of <b>C343-POSS</b>                | S-4  |
| Synthesis of <b>C343-arm</b>                 | S-6  |
| IR spectra                                   | S-8  |
| Optical Properties                           | S-8  |
| DLS Measurement                              | S-10 |
| Solvent Effect                               | S-10 |
| Mass Spectrometry of Decomposition Compounds | S-11 |
| Limit of Detection                           | S-12 |
| Mechanism Study                              | S-13 |
| Thermal Analysis                             | S-15 |
| References                                   | S-16 |

## Materials and Methods

### Instrumentation

$^1\text{H}$ ,  $^{13}\text{C}$  and  $^{29}\text{Si}$  NMR spectra were recorded on JEOL AL400 instruments at 400, 100 and 80 MHz respectively.  $^{19}\text{F}$  NMR spectra were recorded on JEOL ECZ400S instruments at 376 MHz. Samples were analyzed in  $\text{CDCl}_3$ . The chemical shift values were expressed relative to  $\text{Me}_4\text{Si}$  ( $^1\text{H}$ ,  $^{13}\text{C}$  and  $^{29}\text{Si}$ ) and  $\text{C}_6\text{F}_6$  ( $^{19}\text{F}$ ,  $-163$  ppm) as internal standards in  $\text{CDCl}_3$ . High-resolution mass (HRMS) spectrometry was performed on an EXACTIVE Plus (Thermo Fisher Scientific) at the Technical Support Office (Department of Synthetic Chemistry and Biological Chemistry, Graduate School of Engineering, Kyoto University), and the high-resolution mass spectra (HRMS) were obtained on a Thermo Fisher EXACTIVE for electrospray ionization (ESI). UV-vis spectra were recorded on a SHIMADZU UV-3600i Plus spectrophotometer, and samples were analyzed at room temperature. Fluorescence emission spectra were measured with a HORIBA JOBIN YVON Fluorolog-3 spectrofluorometer. Absolute photoluminescence quantum efficiency ( $\Phi_{\text{PL}}$ ) was recorded on a Hamamatsu Photonics Quantaaurus-QY Plus C13534-01. Elemental analyses were performed with a MICRO CORDER MT-5 (YANACO CO., Ltd.) at the Microanalytical Center of Kyoto University. Thermogravimetric analysis (TGA) was recorded on a Hitachi High-Tech Science Corporation. TA STA7200RV. Differential scanning calorimetry (DSC) was recorded on a Hitachi High-Tech Science Corporation. TA DSC7020. The sample on the aluminum pan was heated at the rate of  $10$   $^\circ\text{C}/\text{min}$  under nitrogen flowing ( $50$   $\text{mL}/\text{min}$ ). The dynamic light scattering (DLS) measurements were carried out at  $90^\circ$  scattering angle and  $20 \pm 0.2$   $^\circ\text{C}$  using a FPAR-1000 particle analyzer with a He-Ne laser as a light source. The CONTIN program was used for data analysis to extract information on the average hydrodynamic size. All reactions were performed under nitrogen atmosphere.

## Materials.

Propylamine, 4-(diethylamino)salicylaldehyde was purchased from Tokyo Chemical Industry Co, Ltd. Tetrabutylammonium fluoride (1 M in THF solution), *N,N*-diisopropylethylamine (DIEA), meldrum's acid, and 4-(4,6-dimethoxy-1,3,5-triazin-2-yl)-4-methylmorpholinium chloride (DMT-MM) were purchased from FUJIFILM Wako Pure Chemical Corporation. 1-[Bis(dimethylamino)methylene]-1*H*-benzotriazolium 3-oxide hexafluorophosphate (HBTU) was purchased from PEPTIDE INSTITUTE, INC. *N,N*-Dimethylformamide (DMF) (deoxidized grade), and dimethyl sulfoxide (DMSO) (deoxidized grade) were purchased from Wako and used as the reaction solvent. All compounds were used without purification. Octakis(3-aminopropyl) POSS hydrochloride (**Amino-POSS**)<sup>1</sup> and coumarin 343 (C343)<sup>2</sup> were synthesized according to the literatures.

## Sample Preparation for Optical Measurements for Anion Sensing

The stock solution of **C343-POSS** in CHCl<sub>3</sub> ( $1.6 \times 10^{-3}$  M per C343 unit) was prepared. This stock solution (30  $\mu$ L) was diluted with THF (2970  $\mu$ L) and stirred on a Fisher vortex for 30 s with a speed of 8 to obtain **C343-POSS** ( $1.6 \times 10^{-5}$  M per C343 unit) in THF/CHCl<sub>3</sub> (99/1 v/v) mixed solution. Diluted TBAF in THF (3  $\mu$ L) was added within 30 s and stirred again for 30 s to prepare each concentration. The measurements were initiated 15 min after the end of stirring for Figures 2a and S11, and 1 min after the end of stirring for Figures 2b and 2c to monitor the difference. In the case of anti-interference tests, the anions in THF (3  $\mu$ L,  $1.0 \times 10^{-5}$  M) were added within 1 min.

## Synthetic Procedures and Characterization

### Synthesis of C343-POSS

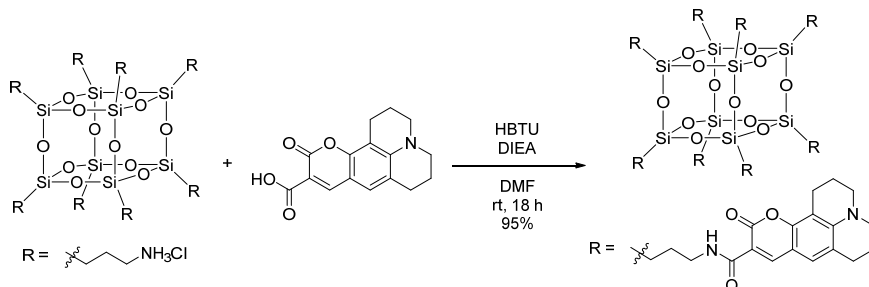

C343 (55.3 mg, 0.19 mmol) and HBTU (88.3 mg, 0.23 mmol) were placed in a round-bottom flask equipped with a magnetic stirring bar. DMF (10 mL) and DIEA (0.081 mL, 0.47 mmol) were added to the flask. After the mixture was activated at room temperature for 30 min, Amino-POSS (22.8 mg, 0.019 mmol) was added to this solution and stirred for 18 h. The precipitate was collected by filtration, washed with DMF, cyclohexane and dried *in vacuo*. The yellow solid of **C343-POSS** (55.4 mg, 0.0183 mmol, 95%) was then obtained.

$^1\text{H}$  NMR ( $\text{CDCl}_3$ , 400 MHz)  $\delta$  8.81 (t,  $J = 5.6$  Hz, 1H), 8.48 (s, 1H), 6.88 (s, 1H), 3.46-3.41 (m, 2H), 3.27-3.22 (m, 4H), 2.77 (t,  $J = 6.3$  Hz, 2H), 2.69 (t,  $J = 6.2$  Hz, 2H), 1.91 (d,  $J = 5.1$  Hz, 4H), 1.77-1.72 (m, 2H), 0.75-0.71 (m, 2H) ppm;  $^{13}\text{C}$  NMR ( $\text{CDCl}_3$ , 100 MHz)  $\delta$  163.3, 162.7, 152.3, 147.7, 147.5, 126.8, 119.2, 109.2, 108.1, 105.4, 50.1, 49.7, 42.1, 27.3, 23.0, 21.1, 20.1, 20.0, 9.4 ppm;  $^{29}\text{Si}$  NMR ( $\text{CDCl}_3$ , 80 MHz)  $\delta$  -66.9 (s) ppm. HRMS (ESI) calcd. for  $\text{C}_{152}\text{H}_{168}\text{N}_{16}\text{O}_{32}\text{Si}_8$   $[\text{M}+\text{Na}]^+$ : 3039.9853, found: 3039.9855.

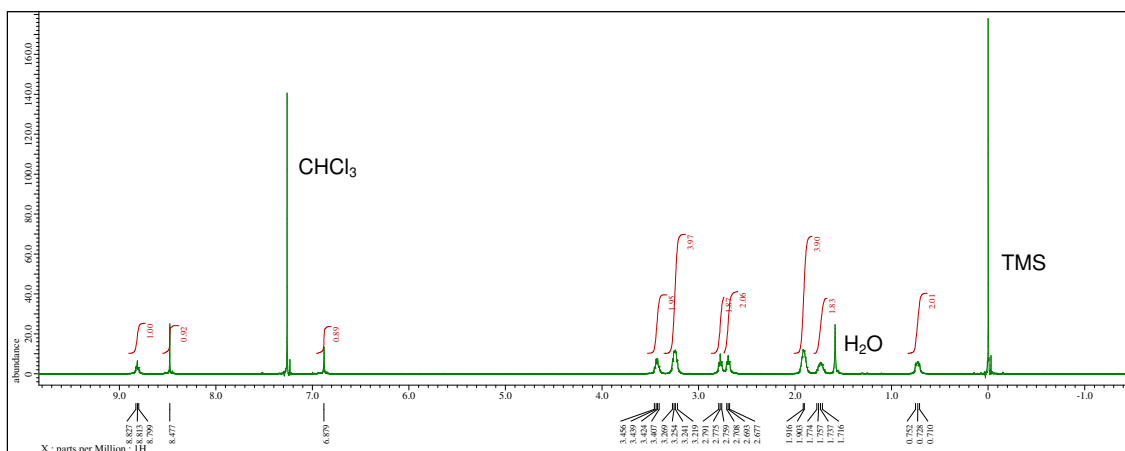

**Figure S1.**  $^1\text{H}$  NMR spectrum of **C343-POSS** in  $\text{CDCl}_3$ .

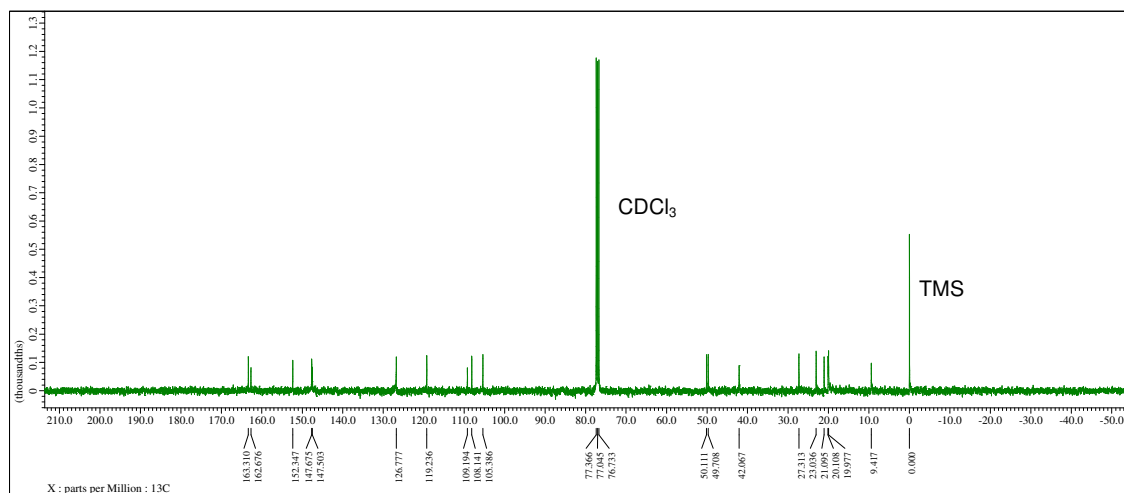

**Figure S2.**  $^{13}\text{C}$  NMR spectrum of C343-POSS in  $\text{CDCl}_3$ .

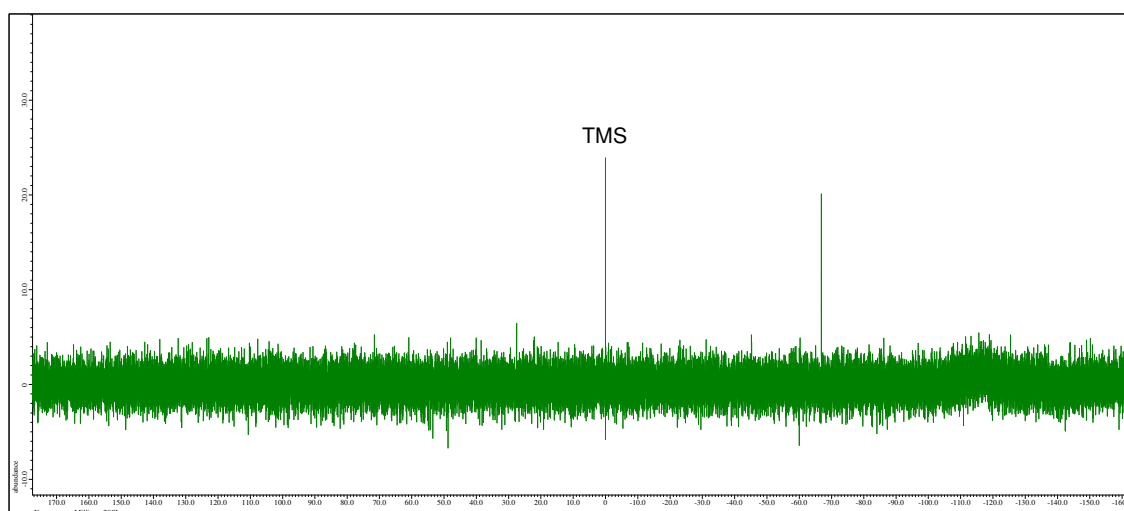

**Figure S3.**  $^{29}\text{Si}$  NMR spectrum of C343-POSS in  $\text{CDCl}_3$ .

### Synthesis of C343-arm

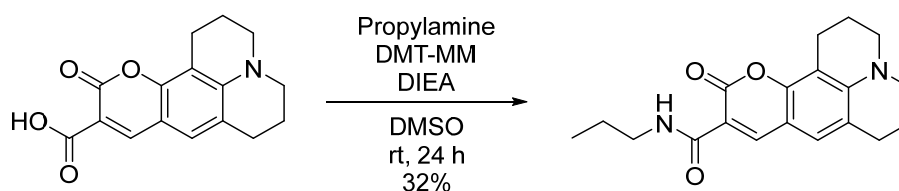

C-343 (28.5 mg, 0.1 mmol) was dissolved in 5 mL of DMSO in a flask. DMT-MM (55.3 mg, 0.2 mmol) was added to the solution, and the mixture was stirred at room temperature for 30 min, followed by addition of propylamine (5.9 mg, 0.1 mmol) and DIEA (34.8  $\mu\text{L}$ , 0.2 mmol). The mixture was

additionally stirred at room temperature for 24 h and dropped into 250 mL of 0.5 M NaHCO<sub>3</sub> aq. and the products were precipitated. The precipitation was collected by filtration and washed with water and dried *in vacuo*. Recrystallization from hot EtOH/water afforded **C343-arm** as a yellow crystal (10.6 mg, 0.032 mmol, 32%).

<sup>1</sup>H NMR (CDCl<sub>3</sub>, 400 MHz) δ 8.87 (s, 1H), 8.61 (s, 1H), 7.01 (s, 1H), 3.40 (d, *J* = 5.9 Hz, 2H), 3.33 (s, 4H), 2.89 (t, *J* = 6.4 Hz, 2H), 2.78 (t, *J* = 6.6 Hz, 2H), 1.98-1.98 (m, 4H), 1.65-1.63 (m, 2H), 0.98 (t, *J* = 6.9 Hz, 3H) ppm; <sup>13</sup>C NMR (CDCl<sub>3</sub>, 100 MHz) δ 163.5, 163.1, 152.6, 148.0, 148.0, 127.0, 119.6, 109.3, 108.3, 105.7, 50.2, 49.8, 41.3, 27.5, 22.9, 21.2, 20.2, 20.1, 11.5 ppm. HRMS (ESI) calcd. for C<sub>19</sub>H<sub>20</sub>N<sub>2</sub>O<sub>3</sub> [M+Na]<sup>+</sup>: 349.1523, found: 349.1527.

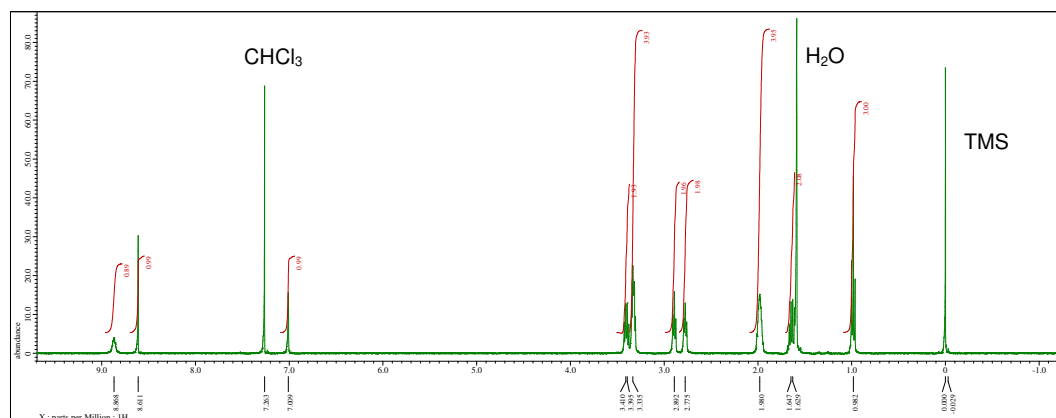

**Figure S4.** <sup>1</sup>H NMR spectrum of **C343-arm** in CDCl<sub>3</sub>.

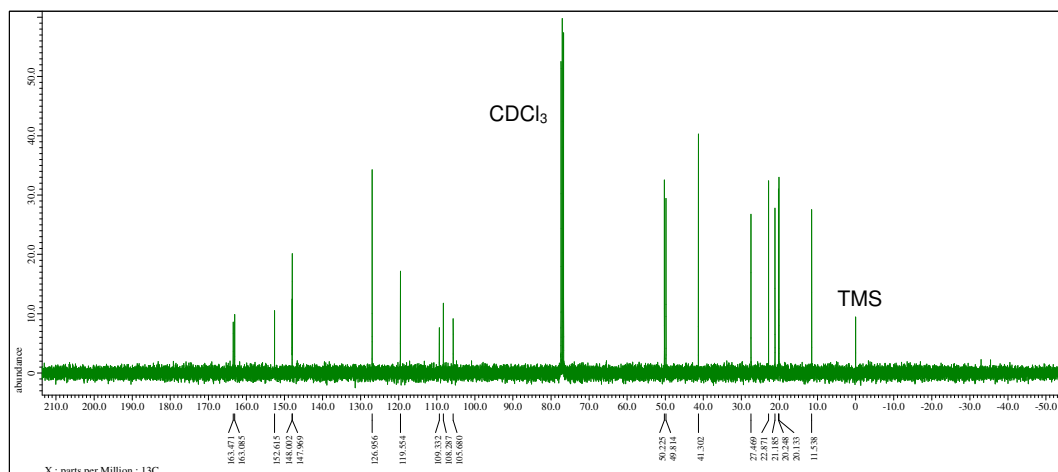

**Figure S5.** <sup>13</sup>C NMR spectrum of **C343-arm** in CDCl<sub>3</sub>.

## IR Spectra

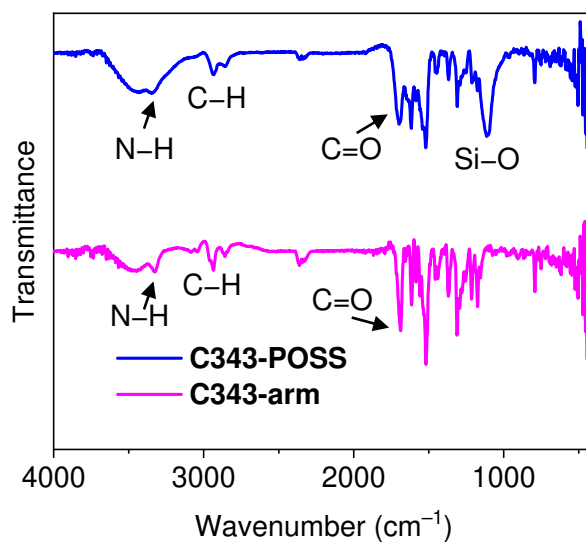

**Figure S6.** IR spectra of **C343-POSS** and **C343-arm** in KBr pellets.

## Optical Properties

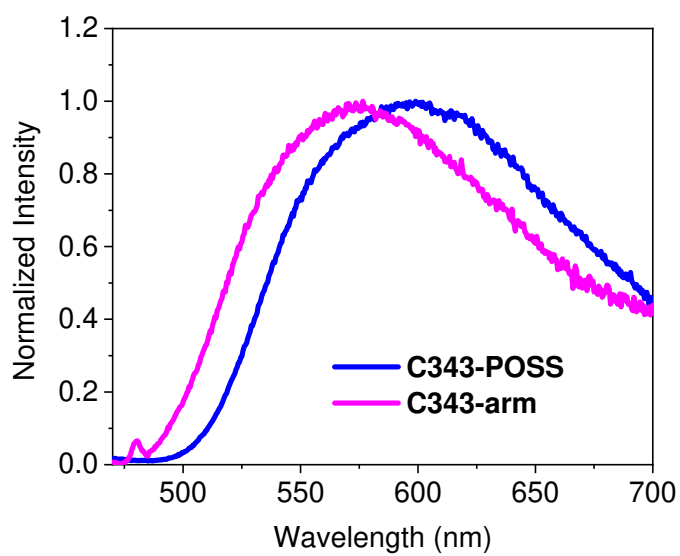

**Figure S7.** Emission spectra of **C343-POSS** and **C343-arm** in the solid state.



**Table S1. Optical data of C343-POSS and C343-arm in solution and solid states**

|                  |                                    | $\lambda_{\max}^{\text{abs}}$ (nm) | $\lambda_{\max}^{\text{em}}$ (nm) <sup>c</sup> | $\epsilon(\text{M}^{-1} \text{cm}^{-1})$ <sup>d</sup> | $\Phi_{\text{PL}}$ (%) |
|------------------|------------------------------------|------------------------------------|------------------------------------------------|-------------------------------------------------------|------------------------|
| <b>C343-POSS</b> | CHCl <sub>3</sub> <sup>a</sup>     | 429                                | 461                                            | 37,300                                                | 30                     |
|                  | THF/CHCl <sub>3</sub> <sup>b</sup> | 418                                | 464, 541                                       | 20,100                                                | 9                      |
|                  | solid                              | -                                  | 596                                            | -                                                     | 2                      |
| <b>C343-arm</b>  | CHCl <sub>3</sub> <sup>a</sup>     | 432                                | 460                                            | 48,000                                                | 85                     |
|                  | THF/CHCl <sub>3</sub> <sup>b</sup> | 425                                | 462                                            | 43,700                                                | 82                     |
|                  | solid                              | -                                  | 574                                            | -                                                     | 5                      |

<sup>a</sup>  $1.6 \times 10^{-5}$  M per C343 unit (absorption),  $8.0 \times 10^{-6}$  M per C343 unit (emission and  $\Phi_{\text{PL}}$ ).

<sup>b</sup> In THF/CHCl<sub>3</sub> = 99/1 v/v mixed solution,  $1.6 \times 10^{-5}$  M per C343 unit.

<sup>c</sup> Excited at the wavelengths of absorption maxima ( $\lambda_{\text{abs}}$ ).

<sup>d</sup> Calculated based on the concentration of C343 unit.

### DLS Measurement

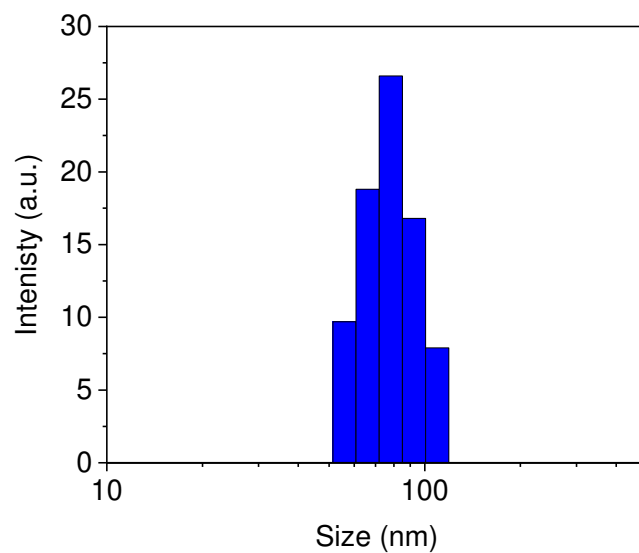

**Figure S8.** Number-averaged hydrodynamic size distribution of **C343-POSS** ( $1.6 \times 10^{-5}$  M per C343 unit) in the THF/ $\text{CHCl}_3$  (99/1 v/v) mixed solution.

### Solvent Effect

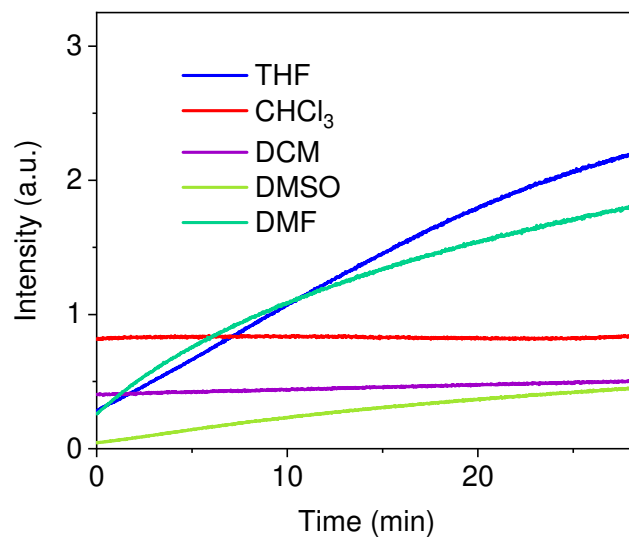

**Figure S9.** Photoluminescence intensity kinetics of **C343-POSS** ( $1.6 \times 10^{-5}$  M per C343 unit) in various solutions (solvent/ $\text{CHCl}_3$  = 99/1 v/v) upon the addition of TBAF (100 equiv.).

### Limit of Detection

The calculation of the limit of detection ( $L_D$ ) was carried out by the data from 0 to 20  $\mu\text{M}$  of TBAF with good correlation between fluoride concentration and fluorescence intensity at low concentration area. This is because at high concentration such as 50  $\mu\text{M}$  (25 equiv. or 3.125 equiv. per C343 unit), fluoride anions should be overconsumed and  $L_D$  might be underestimated.

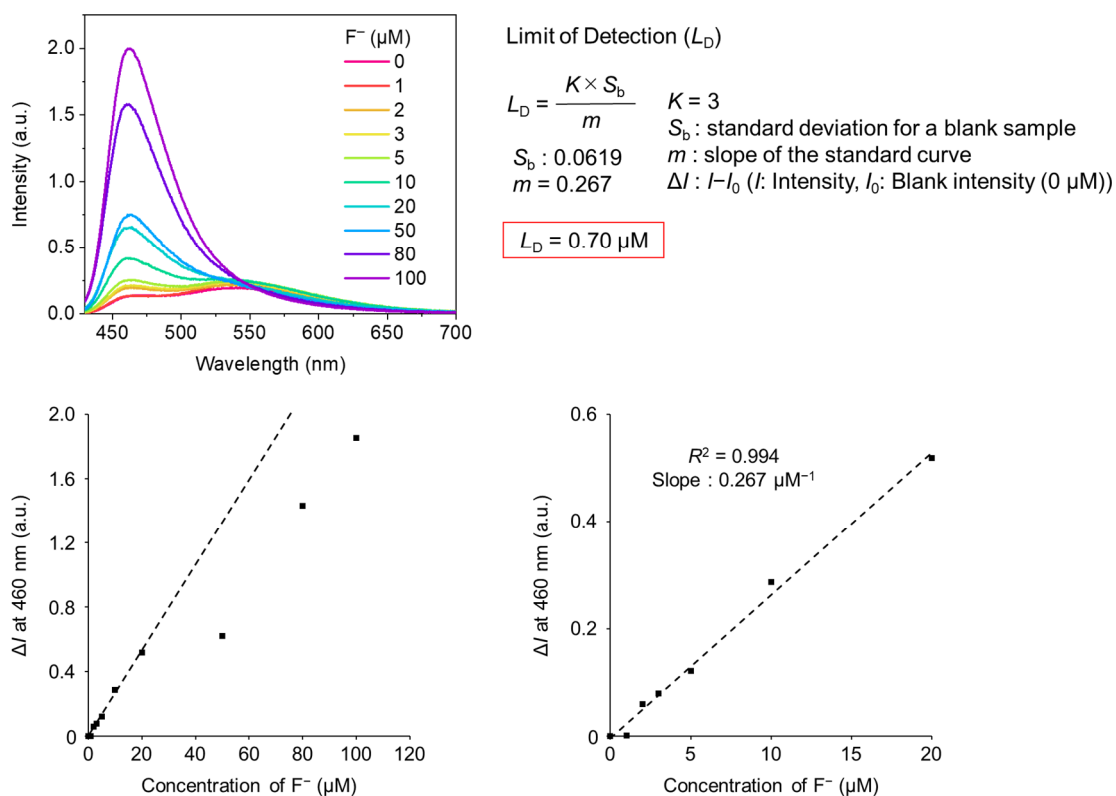

**Figure S10.** Fluorescence enhancement upon addition of  $\text{F}^-$  and calculation of limit of detection ( $L_D$ ).  $[\text{C343-POSS}] = 1.6 \times 10^{-5} \text{ M}$  per C343 unit in THF/ $\text{CHCl}_3$  (99/1 v/v) mixed solution. The cation is tetrabutylammonium (TBA).

### Mass Spectrometry of Decomposition Compounds

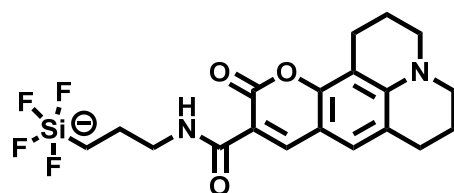

D1

HRMS (ESI) calcd. for  $C_{19}H_{21}F_4N_2O_3Si$   $[M-H]^-$ : 429.1263 found: 429.1262

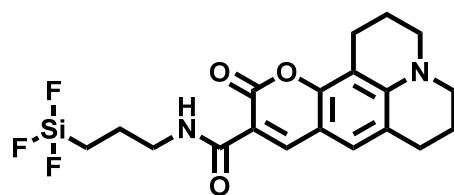

D2

HRMS (ESI) calcd. for  $C_{19}H_{21}F_3N_2O_3Si$   $[M-H]^-$ : 409.1201 found: 409.1200

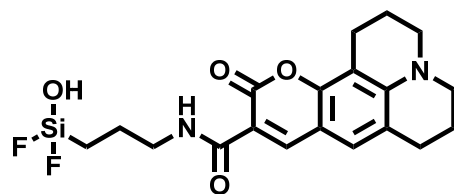

D3

HRMS (ESI) calcd. for  $C_{19}H_{22}F_2N_2O_4Si$   $[M-H]^-$ : 407.1244 found: 407.1245

**Figure S11.** Molecular weights obtained from HRMS spectra of decomposition products.

## Mechanism Study

TBAF only

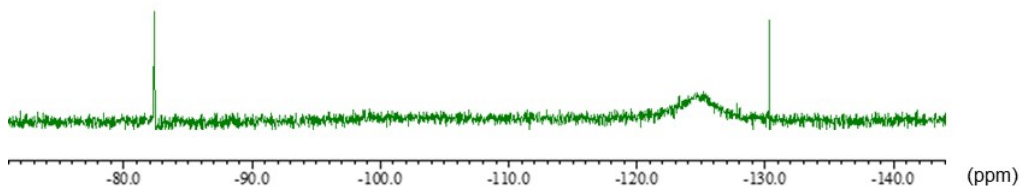

**Figure S12.** <sup>19</sup>F NMR spectrum of TBAF in CDCl<sub>3</sub> after 12 h of standstill at room temperature.

C343-POSS

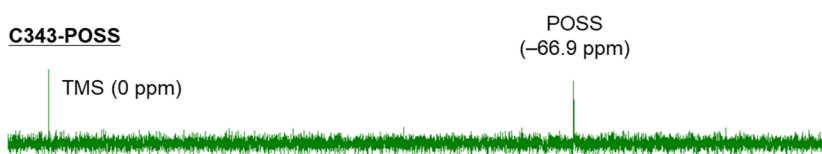

C343-POSS + TBAF

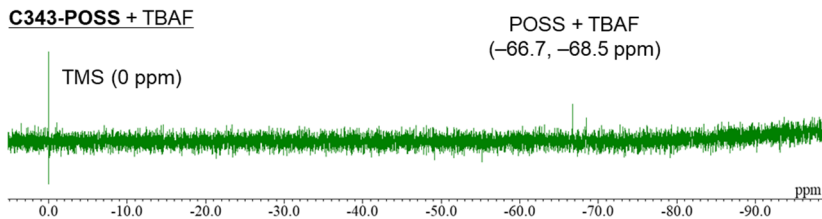

**Figure S13.** <sup>29</sup>Si NMR of C343-POSS before and after the addition of TBAF in CDCl<sub>3</sub>.

C343-POSS

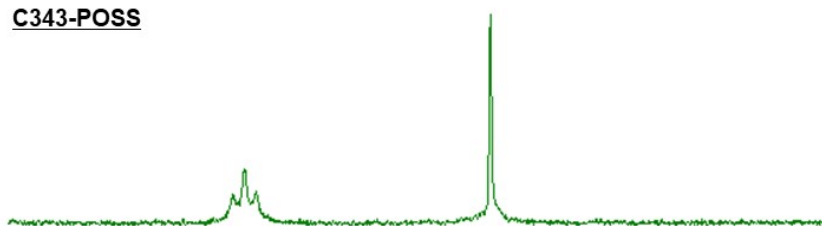

C343-POSS + TBAF (4equiv.)

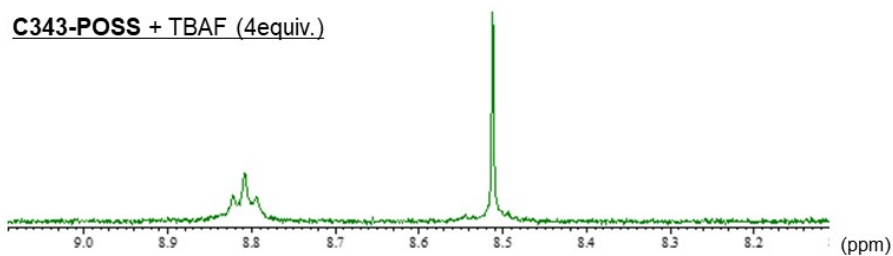

**Figure S14.** <sup>1</sup>H NMR of C343-POSS before and after the addition of TBAF (4 equiv.) in CDCl<sub>3</sub>. The peak of  $\delta$  8.81 ppm is attributed to amide proton.

**Table S2.**  $^{19}\text{F}$  NMR data in previous reports

| Compound                                                                            | Solvent                  | Chemical shift (ppm) | reference |
|-------------------------------------------------------------------------------------|--------------------------|----------------------|-----------|
| 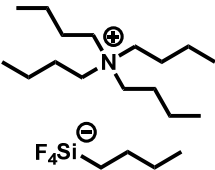   | $\text{CD}_2\text{Cl}_2$ | -116.6               | [3]       |
|    | $\text{CD}_2\text{Cl}_2$ | -110.5               | [3]       |
|  | $\text{CDCl}_3$          | -119.2               | [4]       |
|  | $\text{CDCl}_3$          | -142.2               | [4]       |
|  | $\text{CDCl}_3$          | -137.98              | [4]       |

## Thermal analysis

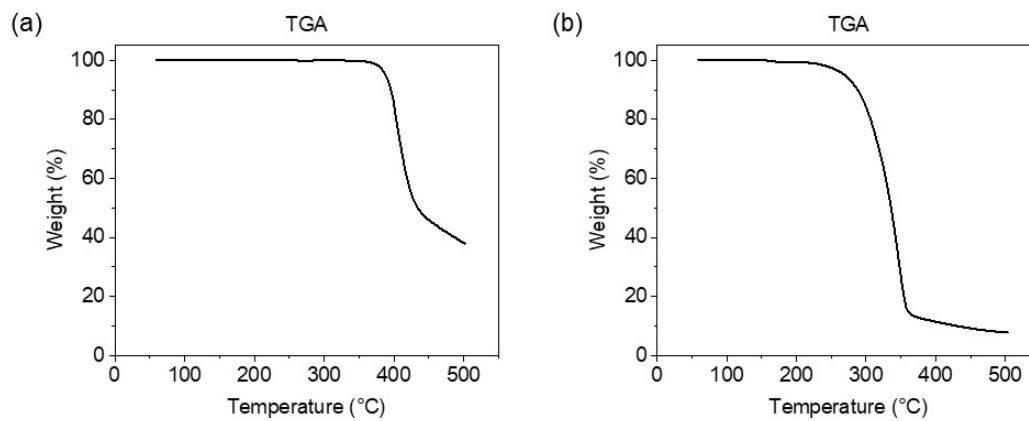

Figure S15. TGA curves of (a) C343-POSS and (b) C343-arm.

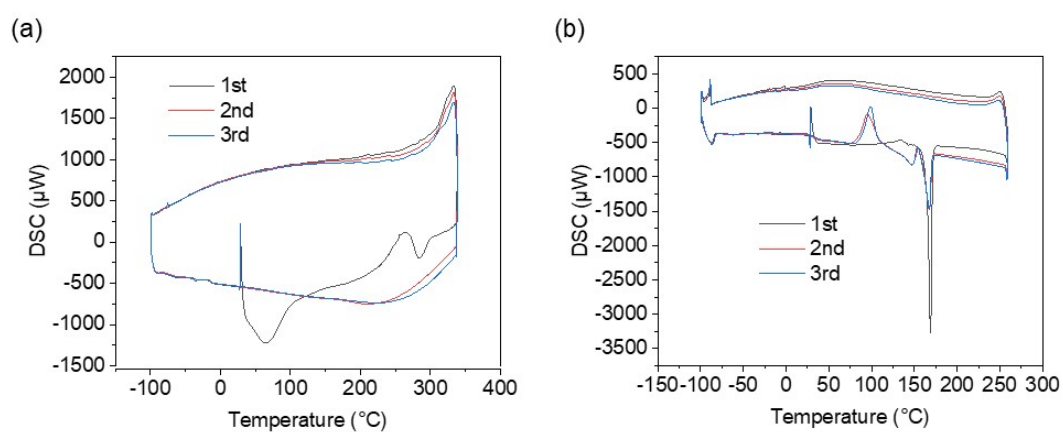

Figure S16. DSC thermograms of (a) C343-POSS and (b) C343-arm.

## References

1. K. Tanaka, K. Inafuku, S. Adachi and Y. Chujo, *Macromolecules*, 2009, **42**, 3489–3492.
2. N. Draoui, O. Schicke, A. Fernandes, X. Drozak, F. Nahra, A. Dumont, J. Douxfils, E. Hermans, J.-M. Dogné, R. Corbau, A. Marchand, P. Chaltin, P. Sonveaux, O. Feron and O. Riant, *Bioorg. Med. Chem.*, 2013, **21**, 7107–7117.
3. F. Klanberg, and E. L. Muetterties, *Inorg. Chem.*, 1968, **7**, 155–160.
4. C. Shiau, T.-L. Hwang and C.-S. Liu, *J. Organomet. Chem.*, 1981, **214**, 31–39.
